# Supplementary material for: Three new POM-based coordination polymers with 1,3,5-tris(1-imidazolyl)benzene ligand: syntheses, structures and proton conductivity
Source: Royal Society of Chemistry journal article supplement (doi:10.1039/d2ce00061j), 2022-01-01
Supplement: d2ce00061j1.pdf [file d2ce00061j1.pdf]

## Electronic Supplementary Information

### Three New POM-based Coordination Polymers with 1, 3, 5-tris (1-imidazolyl)benzene Ligand: Syntheses, Structures and Proton Conductivity

Lin-Lin Chen,<sup>‡</sup> Ya-Jie Shi,<sup>‡</sup> Wen-Wen Wu, Jia-Xin Wang, Ya-Min Li,<sup>\*</sup> Yan Bai and Dong-Bin Dang<sup>\*</sup>

*Henan Key Laboratory of Polyoxometalate Chemistry, College of Chemistry and Chemical Engineering, Henan University, Kaifeng, Henan 475004, China*

## Additional Figures

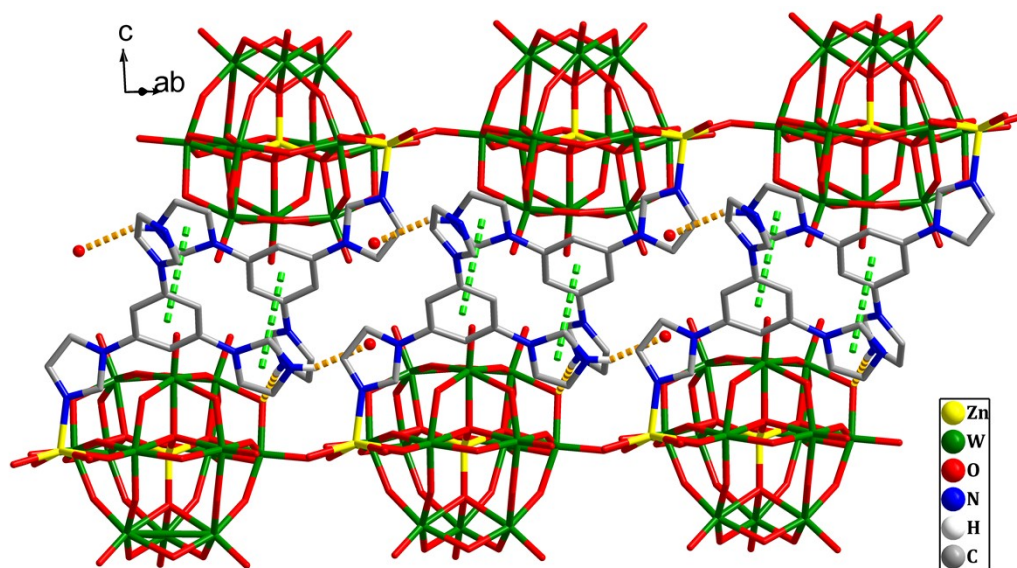

**Fig. S1**  $\pi$ - $\pi$  interactions and hydrogen-bonding interactions in two neighboring 2D layers B in compound 2.

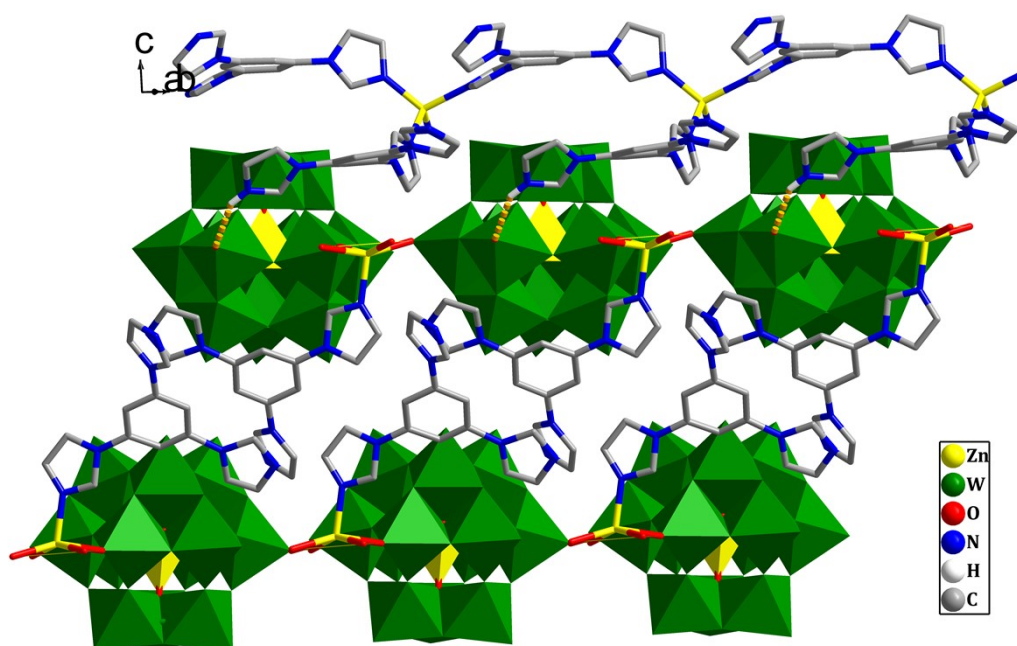

**Fig. S2** Hydrogen-bonding interactions between 2D layer A and bilayer B in compound 2

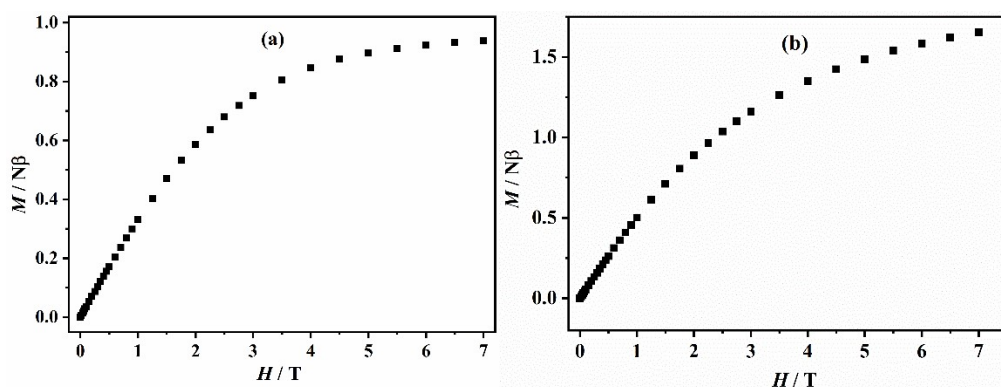

**Fig. S3** Isothermal magnetization of **1** (a) and **3** (b) at 2 K.

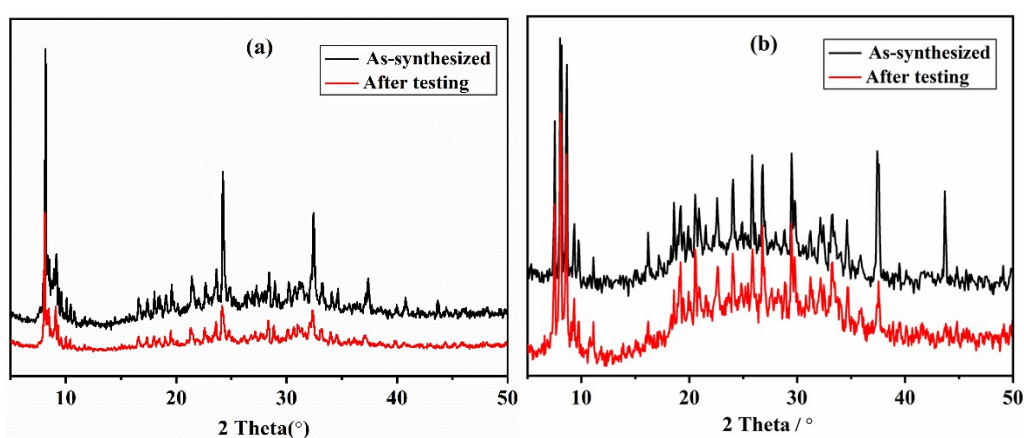

**Fig. S4** The powder X-ray diffraction patterns of **2** (a) and **3** (b) before and after testing.

## PXRD

X-ray powder diffraction test analyses of compounds **1-3** were conducted in the range of  $2\theta = 5-50^\circ$ . As shown in Fig. S5, the peak position of the experimental PXRD is basically consistent with the theoretical peak position of the measured data of single crystal structure. PXRD data of compounds **1-3** suggest that the samples are of high purity and retain their crystallinity. The difference of peak strength mainly contributes to the preparation of samples before the test and the different orientations during the test.

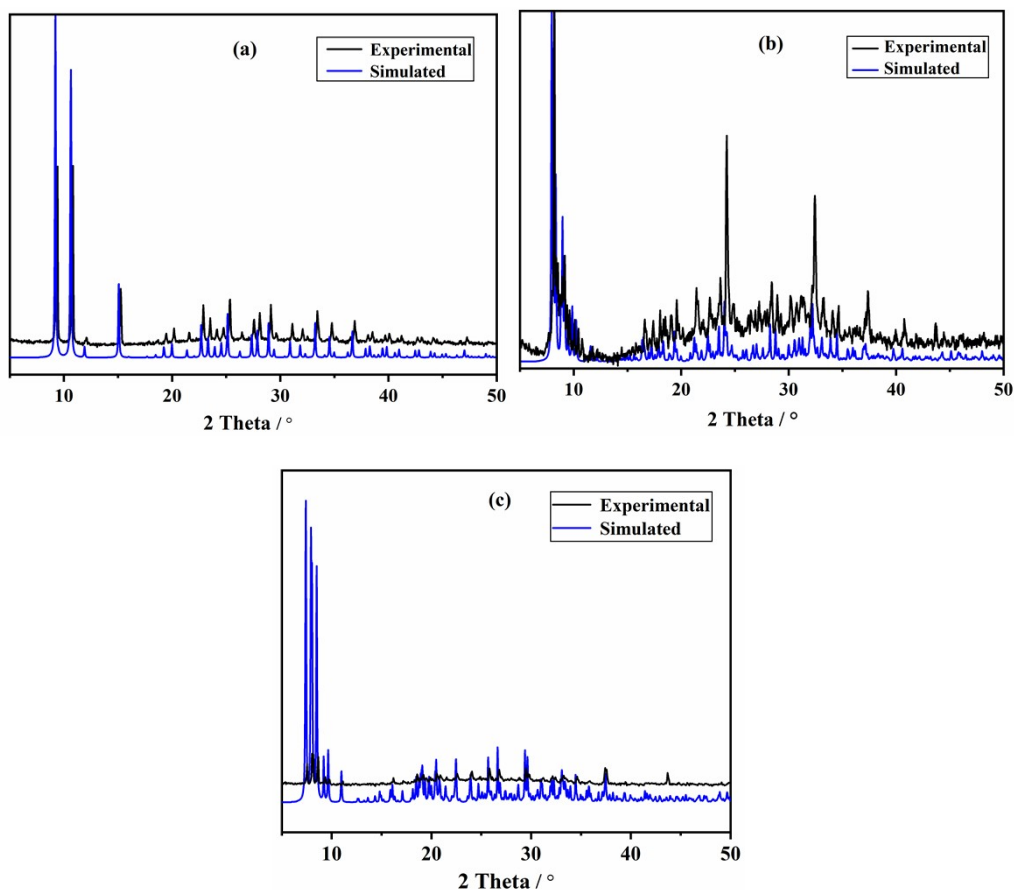

Fig. S5 PXRD patterns of compounds **1** (a), **2** (b) and **3** (c).

## TG Analysis

The thermogravimetric analyses have been performed on the thermal stability of compounds **1-3**. They were tested under N<sub>2</sub> atmosphere at temperature range of 25 - 1000 °C with a rate of 10 °C/minutes. As shown in Fig. S6, since there are no water molecules in compound **1**, the weight loss curve does not decrease as the temperature rise at the beginning, whereas both compounds **2** and **3** show two-step weight loss. As the temperature gradually increases, the weight loss curves of compounds **2** and **3** gradually decrease, which is mainly attributed to the loss of water molecules in compounds. With the temperature rising continually, the weight of the compounds **1-3** drop sharply in the temperature range above 450°C, 431°C, and 455°C, respectively, attributed to the loss of all organic ligands and the collapse of the skeleton. Their frameworks also preserve the structural integrity up to 431 °C. The different thermal stability between compounds **1-3** is mainly due to the difference of complex structure.

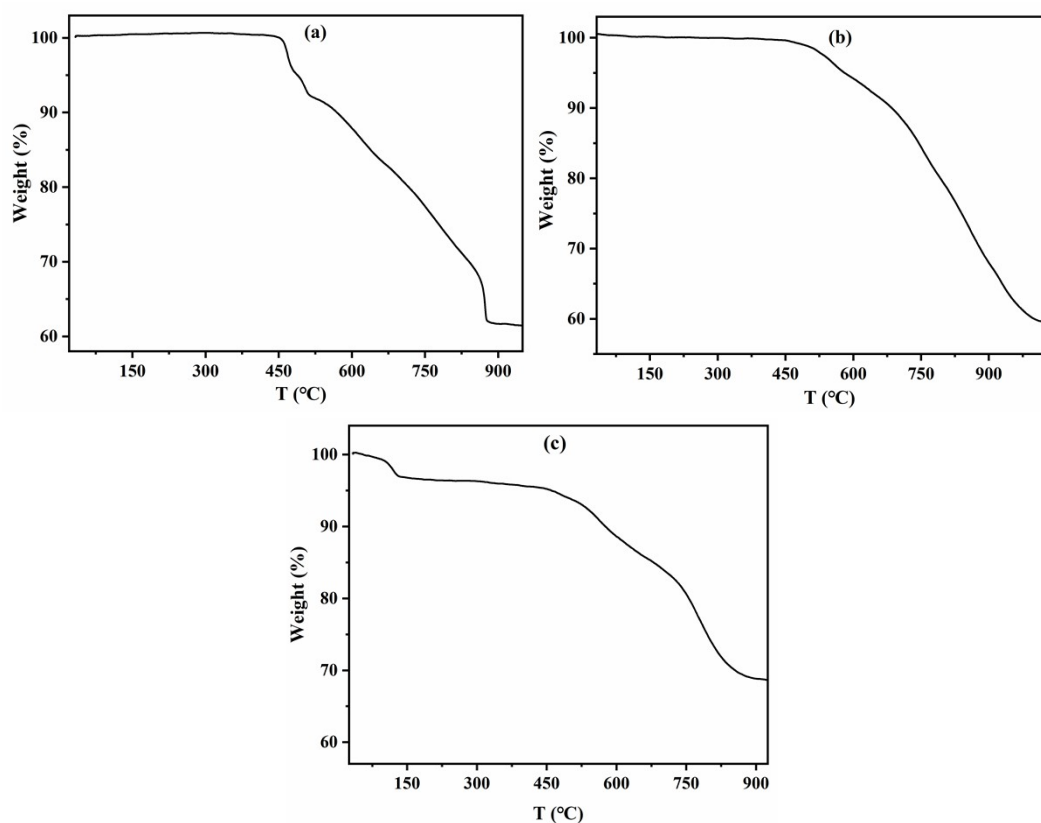

**Fig. S6** TGA curves of compounds **1** (a), **2** (b) and **3** (c).

## IR spectra

The FT-IR spectra of compounds **1-3** are displayed in Fig. S7. The absorption peak in the range of 700-1100  $\text{cm}^{-1}$  is mainly derived from the stretching vibration of W- $\text{O}_{\text{b/c/d}}$  bond in the polyacid anion (b/c: bridge oxygen, d: terminal oxygen). The characteristic bands observed at 1069, 974, 808, 659  $\text{cm}^{-1}$  for **1**, 1009, 940, 880, 747  $\text{cm}^{-1}$  for **2**, 1072, 946, 887, 768  $\text{cm}^{-1}$  for **3** are attributed to  $\nu(\text{W}-\text{O}_\text{t})$ ,  $\nu(\text{W}-\text{O}_\text{b}-\text{W})$ ,  $\nu(\text{W}-\text{O}_\text{c}-\text{W})$ , respectively. In addition, bands observed at 1626, 1521, 1320, 1245  $\text{cm}^{-1}$  for **1**, 1629, 1540, 1331, 1104  $\text{cm}^{-1}$  for **2**, 1624, 1519, 1323, 1254  $\text{cm}^{-1}$  for **3** stem from the C=C/C=N stretching vibrations in the ligands. All above proved the existence of polyacid anions and ligands in compounds **1-3**.

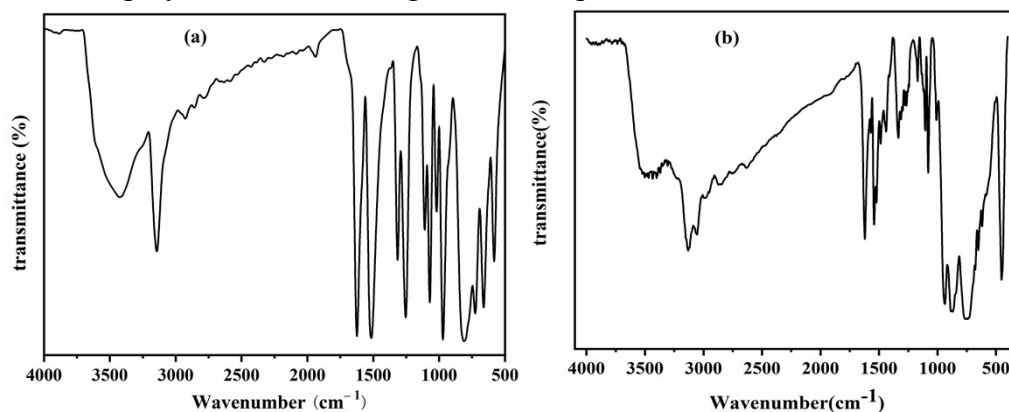

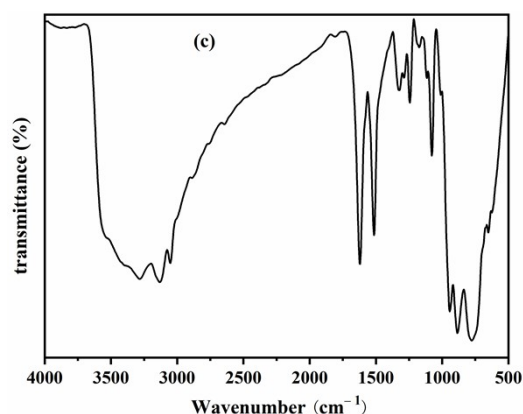

Fig. S7 IR spectra of compounds **1** (a), **2** (b) and **3** (c).

## Proton conductivity measurement

Electrochemical impedance spectroscopy was measured on a impedance analyzer Solartron 1260 and 1296 in a frequency range of 1 Hz to 10 MHz at amplitude of 0.01 V. Ac impedance maps were analyzed by Power-Suite, with the resistance value determined from equivalent circuit fits of the first semi-circle using ZView Software. Proton conductivity was calculated using the following equation:  $\sigma = L/(RS)$ .  $\sigma$  for electrical conductivity ( $S \cdot cm^{-1}$ );  $L$  is the slice thickness (cm);  $S$  is piece surface area namely  $\Pi r^2$  ( $cm^2$ ) (where  $r$  is the radius of the slice. (cm));  $R$  was extracted directly from the impedance plots, which is the bulk resistance of the sample ( $\Omega$ ). Activation energy ( $E_a$ ) was calculated with the Arrhenius equation  $\sigma T = \sigma_0 \exp(-E_a/K_B T)$ , where  $\sigma$  is the proton conductivity,  $\sigma_0$  is the preexponential factor,  $K_B$  is the Boltzmann constant, and  $T$  is the temperature.

Table S1 The selected bond lengths ( $\text{\AA}$ ) and angles ( $^\circ$ ) of compounds **1-3**.

| Compound <b>1</b>                        |           |                         |            |
|------------------------------------------|-----------|-------------------------|------------|
| Cu1–N1                                   | 2.13(3)   | O1–W1 <sup>i</sup>      | 2.291(7)   |
| Cu1–N1 <sup>iv</sup>                     | 2.13(3)   | O1–W1 <sup>ix</sup>     | 2.291(7)   |
| Cu1–N1 <sup>v</sup>                      | 2.13(3)   | O1–W1 <sup>iii</sup>    | 2.291(7)   |
| Cu1–N1 <sup>vi</sup>                     | 2.13(3)   | O1–W1                   | 2.291(7)   |
| Cu1–N1 <sup>vii</sup>                    | 2.13(3)   | O1–W1 <sup>ii</sup>     | 2.291(7)   |
| Cu1–N1 <sup>viii</sup>                   | 2.13(3)   | O1–W1 <sup>x</sup>      | 2.291(7)   |
| O3–W1                                    | 1.76(2)   | O4–W1                   | 1.74(2)    |
| O2–W1 <sup>i</sup>                       | 2.05(2)   | O4–W1 <sup>x</sup>      | 1.82(2)    |
| O2–W1                                    | 2.09(2)   | W1 <sup>x</sup> –O1–W1  | 83.5 (2)   |
| N1 <sup>vii</sup> –Cu1–N1 <sup>iv</sup>  | 88.9 (11) | W1–O4–W1 <sup>x</sup>   | 118.2 (12) |
| N1 <sup>vii</sup> –Cu1–N1                | 88.9 (11) | O2 <sup>ii</sup> –W1–O2 | 78.2 (12)  |
| N1 <sup>viii</sup> –Cu1–N1 <sup>v</sup>  | 88.9 (11) | O2–W1–O1                | 75.0 (7)   |
| N1 <sup>v</sup> –Cu1–N1                  | 91.1 (11) | O2 <sup>ii</sup> –W1–O1 | 75.8 (6)   |
| N1 <sup>viii</sup> –Cu1–N1 <sup>vi</sup> | 88.9 (11) | O2–W1–W1 <sup>x</sup>   | 122.8 (6)  |

|                                           |            |                                        |            |
|-------------------------------------------|------------|----------------------------------------|------------|
| N1 <sup>viii</sup> —Cu1—N1                | 91.1 (11)  | O2 <sup>ii</sup> —W1—W1 <sup>x</sup>   | 81.1 (6)   |
| N1 <sup>vi</sup> —Cu1—N1 <sup>v</sup>     | 88.9 (11)  | O2—W1—W1 <sup>iii</sup>                | 80.5 (7)   |
| N1 <sup>iv</sup> —Cu1—N1 <sup>v</sup>     | 180        | O2 <sup>ii</sup> —W1—W1 <sup>iii</sup> | 123.5 (6)  |
| N1 <sup>vii</sup> —Cu1—N1 <sup>vi</sup>   | 91.1 (11)  | O1—W1—W1 <sup>x</sup>                  | 48.25 (10) |
| N1 <sup>viii</sup> —Cu1—N1 <sup>vii</sup> | 180.0 (9)  | O1—W1—W1 <sup>iii</sup>                | 48.25 (10) |
| N1 <sup>vi</sup> —Cu1—N1                  | 180        | O4—W1—O2 <sup>ii</sup>                 | 90.8 (11)  |
| N1 <sup>iv</sup> —Cu1—N1                  | 88.9 (11)  | O4 <sup>iii</sup> —W1—O2 <sup>ii</sup> | 152.0 (10) |
| N1 <sup>viii</sup> —Cu1—N1 <sup>iv</sup>  | 91.1 (11)  | O4—W1—O2                               | 154.4 (10) |
| N1 <sup>vi</sup> —Cu1—N1 <sup>iv</sup>    | 91.1 (11)  | O4 <sup>iii</sup> —W1—O2               | 85.1 (11)  |
| N1 <sup>vii</sup> —Cu1—N1 <sup>v</sup>    | 91.1 (11)  | O4—W1—O1                               | 79.9 (8)   |
| W1 <sup>i</sup> —O2—W1                    | 111.4 (11) | O4 <sup>iii</sup> —W1—O1               | 78.2 (7)   |
| O4—W1—O4 <sup>iii</sup>                   | 94.9 (4)   | O4—W1—O3                               | 110.9 (11) |
| O3—W1—O2                                  | 93.6 (10)  | O4—W1—W1 <sup>x</sup>                  | 31.7 (8)   |
| O3—W1—O1                                  | 167.5 (8)  | O3—W1—O2 <sup>ii</sup>                 | 97.1 (10)  |
| O3—W1—O4 <sup>iii</sup>                   | 106.4 (11) |                                        |            |
| <b>Compound 2</b>                         |            |                                        |            |
| Zn1—N1 <sup>i</sup>                       | 1.987 (5)  | W9—O26                                 | 1.918 (4)  |
| Zn1—N1 <sup>ii</sup>                      | 1.987 (5)  | W9—O28                                 | 1.970 (5)  |
| Zn1—N4 <sup>iii</sup>                     | 1.993 (5)  | W10—O4                                 | 2.174 (4)  |
| Zn1—N4                                    | 1.993 (5)  | W10—O6                                 | 1.991 (4)  |
| Zn2—N8                                    | 1.997 (6)  | W10—O28                                | 1.935 (5)  |
| Zn2—O2W                                   | 2.124 (7)  | W10—O29                                | 1.955 (5)  |
| Zn2—O7 <sup>iv</sup>                      | 1.979 (4)  | W10—O34                                | 1.868 (5)  |
| Zn2—O11 <sup>i</sup>                      | 2.212 (5)  | W10—O35                                | 1.719 (5)  |
| Zn2—O20                                   | 2.052 (5)  | W11—O2                                 | 2.208 (4)  |
| Zn3—O2                                    | 1.891 (4)  | W11—O8                                 | 1.967 (5)  |
| Zn3—O3                                    | 1.876 (4)  | W11—O19                                | 1.924 (5)  |
| Zn3—O4                                    | 1.884 (5)  | W11—O21                                | 1.925 (4)  |
| Zn3—O17                                   | 1.875 (4)  | W11—O29                                | 1.893 (5)  |
| W9—O20                                    | 1.756 (5)  | W11—O36                                | 1.714 (5)  |
| W1—O5                                     | 1.878 (4)  | W12—O3                                 | 2.188 (4)  |
| W1—O14                                    | 1.908 (4)  | W12—O19                                | 1.890 (5)  |
| W1—O15                                    | 1.710 (4)  | W12—O31                                | 1.899 (5)  |
| W1—O17                                    | 2.183 (4)  | W12—O34                                | 1.983 (5)  |
| W1—O25                                    | 2.012 (4)  | W12—O38                                | 1.980 (5)  |
| W1—O30                                    | 1.965 (4)  | W12—O40                                | 1.709 (5)  |
| W2—W3                                     | 3.2207 (4) | W5—O1                                  | 1.933 (4)  |
| W2—O10                                    | 1.970 (4)  | W5—O4                                  | 2.173 (4)  |
| W2—O13                                    | 1.994 (4)  | W5—O6                                  | 1.891 (4)  |
| W2—O17                                    | 2.145 (4)  | W5—O12                                 | 1.708 (4)  |
| W2—O27                                    | 1.717 (5)  | W5—O26                                 | 1.950 (4)  |

|                                         |             |             |             |
|-----------------------------------------|-------------|-------------|-------------|
| W2—O30                                  | 1.908 (4)   | W5—O33      | 1.967 (4)   |
| W2—O32                                  | 1.879 (5)   | W6—O1       | 1.899 (4)   |
| W3—O5                                   | 2.009 (4)   | W6—O2       | 2.084 (4)   |
| W3—O13                                  | 1.872 (4)   | W6—O7       | 1.753 (4)   |
| W3—O16                                  | 2.009 (4)   | W6—O16      | 1.841 (4)   |
| W3—O17                                  | 2.151 (4)   | W6—O21      | 2.012 (4)   |
| W3—O33                                  | 1.876 (4)   | W6—O24      | 1.970 (4)   |
| W3—O39                                  | 1.713 (4)   | W7—W8       | 3.2389 (5)  |
| W4—O2                                   | 2.176 (4)   | W7—O3       | 2.169 (4)   |
| W4—O8                                   | 1.903 (4)   | W7—O18      | 1.921 (5)   |
| W4—O9                                   | 1.902 (5)   | W7—O23      | 1.946 (5)   |
| W4—O14                                  | 1.924 (4)   | W7—O32      | 1.929 (4)   |
| W4—O22                                  | 1.722 (5)   | W7—O37      | 1.728 (5)   |
| W4—O24                                  | 1.985 (4)   | W7—O38      | 1.902 (5)   |
| W8—O25                                  | 1.847 (4)   | W8—O3       | 2.146 (5)   |
| W8—O31                                  | 1.988 (4)   | W8—O9       | 1.953 (5)   |
| W9—O4                                   | 2.139 (4)   | W8—O11      | 1.749 (5)   |
| W9—O10                                  | 1.869 (4)   | W8—O23      | 1.919 (5)   |
| W9—O18                                  | 1.924 (5)   |             |             |
| N1 <sup>i</sup> —Zn1—N1 <sup>ii</sup>   | 102.1 (3)   | O10—W9—O26  | 92.60 (19)  |
| N1 <sup>ii</sup> —Zn1—N4 <sup>iii</sup> | 113.1 (2)   | O10—W9—O28  | 161.33 (19) |
| N1 <sup>i</sup> —Zn1—N4                 | 113.1 (2)   | O18—W9—O4   | 86.45 (18)  |
| N1 <sup>i</sup> —Zn1—N4 <sup>iii</sup>  | 109.6 (2)   | O18—W9—O28  | 87.1 (2)    |
| N1 <sup>ii</sup> —Zn1—N4                | 109.6 (2)   | O20—W9—O4   | 169.5 (2)   |
| N4 <sup>iii</sup> —Zn1—N4               | 109.4 (3)   | O20—W9—O10  | 100.3 (2)   |
| N8—Zn2—O2W                              | 111.0 (3)   | O20—W9—O18  | 100.1 (2)   |
| N8—Zn2—O11 <sup>i</sup>                 | 92.5 (2)    | O20—W9—O26  | 98.4 (2)    |
| N8—Zn2—O20                              | 92.7 (2)    | O20—W9—O28  | 98.0 (2)    |
| O2W—Zn2—O11 <sup>i</sup>                | 156.3 (2)   | O26—W9—O4   | 74.96 (18)  |
| O7 <sup>iv</sup> —Zn2—N8                | 108.4 (2)   | O26—W9—O18  | 161.4 (2)   |
| O7 <sup>iv</sup> —Zn2—O2W               | 83.7 (2)    | O26—W9—O28  | 88.25 (19)  |
| O7 <sup>iv</sup> —Zn2—O11 <sup>i</sup>  | 91.40 (19)  | O28—W9—O4   | 73.89 (18)  |
| O7 <sup>iv</sup> —Zn2—O20               | 158.4 (2)   | O6—W10—O4   | 73.13 (17)  |
| O20—Zn2—O2W                             | 84.6 (2)    | O28—W10—O4  | 73.76 (17)  |
| O20—Zn2—O11 <sup>i</sup>                | 92.10 (19)  | O28—W10—O6  | 88.93 (19)  |
| O3—Zn3—O2                               | 109.92 (19) | O28—W10—O29 | 159.84 (18) |
| O3—Zn3—O4                               | 110.3 (2)   | O29—W10—O4  | 86.10 (17)  |
| O4—Zn3—O2                               | 110.29 (19) | O29—W10—O6  | 85.83 (18)  |
| O17—Zn3—O2                              | 108.12 (18) | O34—W10—O4  | 89.18 (18)  |
| O17—Zn3—O3                              | 109.64 (19) | O34—W10—O6  | 160.51 (19) |
| O17—Zn3—O4                              | 108.49 (19) | O34—W10—O28 | 94.0 (2)    |
| O5—W1—W2                                | 83.97 (13)  | O34—W10—O29 | 84.8 (2)    |



|            |             |             |             |
|------------|-------------|-------------|-------------|
| O5—W1—O14  | 93.63 (18)  | O35—W10—O4  | 165.2 (2)   |
| O5—W1—O17  | 75.59 (17)  | O35—W10—O6  | 94.9 (2)    |
| O5—W1—O25  | 160.81 (18) | O35—W10—O28 | 97.9 (2)    |
| O5—W1—O30  | 91.46 (18)  | O35—W10—O29 | 102.0 (2)   |
| O14—W1—W2  | 128.33 (13) | O35—W10—O34 | 103.7 (2)   |
| O14—W1—O17 | 88.18 (17)  | O8—W11—O2   | 73.17 (17)  |
| O14—W1—O25 | 83.02 (17)  | O19—W11—O2  | 88.65 (17)  |
| O14—W1—O30 | 159.47 (18) | O19—W11—O8  | 86.88 (19)  |
| O15—W1—W2  | 132.20 (15) | O19—W11—O21 | 161.34 (18) |
| O15—W1—O5  | 101.3 (2)   | O21—W11—O2  | 72.81 (17)  |
| O15—W1—O14 | 98.99 (19)  | O21—W11—O8  | 89.72 (18)  |
| O15—W1—O17 | 172.41 (19) | O29—W11—O2  | 87.33 (17)  |
| O15—W1—O25 | 97.9 (2)    | O29—W11—O8  | 159.32 (18) |
| O15—W1—O30 | 99.5 (2)    | O29—W11—O19 | 85.79 (19)  |
| O17—W1—W2  | 41.15 (11)  | O29—W11—O21 | 91.07 (18)  |
| O25—W1—W2  | 83.40 (13)  | O36—W11—O2  | 167.3 (2)   |
| O25—W1—O17 | 85.40 (17)  | O36—W11—O8  | 99.7 (2)    |
| O30—W1—W2  | 32.74 (13)  | O36—W11—O19 | 101.6 (2)   |
| O30—W1—O17 | 73.86 (17)  | O36—W11—O21 | 97.1 (2)    |
| O30—W1—O25 | 85.66 (18)  | O36—W11—O29 | 100.7 (2)   |
| W3—W2—W1   | 60.433 (9)  | O19—W12—O3  | 88.79 (18)  |
| O10—W2—W1  | 127.26 (13) | O19—W12—O31 | 93.7 (2)    |
| O10—W2—W3  | 82.77 (13)  | O19—W12—O34 | 84.9 (2)    |
| O10—W2—O13 | 85.50 (18)  | O19—W12—O38 | 158.92 (19) |
| O10—W2—O17 | 85.27 (17)  | O31—W12—O3  | 74.40 (18)  |
| O13—W2—W1  | 81.93 (12)  | O31—W12—O34 | 160.14 (19) |
| O13—W2—W3  | 32.42 (12)  | O31—W12—O38 | 91.0 (2)    |
| O13—W2—O17 | 73.87 (17)  | O34—W12—O3  | 85.75 (18)  |
| O17—W2—W1  | 42.04 (11)  | O38—W12—O3  | 72.71 (17)  |
| O17—W2—W3  | 41.51 (11)  | O38—W12—O34 | 83.77 (19)  |
| O27—W2—W1  | 132.35 (15) | O40—W12—O3  | 167.7 (2)   |
| O27—W2—W3  | 127.46 (16) | O40—W12—O19 | 102.6 (2)   |
| O27—W2—O10 | 99.6 (2)    | O40—W12—O31 | 99.8 (2)    |
| O27—W2—O13 | 95.1 (2)    | O40—W12—O34 | 99.8 (2)    |
| O27—W2—O17 | 167.66 (19) | O40—W12—O38 | 96.8 (2)    |
| O27—W2—O30 | 99.1 (2)    | O13—W3—O16  | 161.35 (18) |
| O27—W2—O32 | 102.5 (2)   | O13—W3—O17  | 76.14 (17)  |
| O30—W2—W1  | 33.85 (13)  | O13—W3—O33  | 95.60 (18)  |
| O30—W2—W3  | 83.69 (13)  | O16—W3—W2   | 126.56 (12) |
| O30—W2—O10 | 161.11 (18) | O16—W3—O17  | 85.21 (16)  |
| O30—W2—O13 | 90.10 (18)  | O17—W3—W2   | 41.38 (11)  |
| O30—W2—O17 | 75.86 (17)  | O33—W3—W2   | 91.92 (13)  |
| O32—W2—W1  | 90.73 (14)  | O33—W3—O5   | 160.18 (18) |

|            |             |                         |             |
|------------|-------------|-------------------------|-------------|
| O32—W2—W3  | 129.85 (13) | O33—W3—O16              | 84.42 (18)  |
| O32—W2—O10 | 85.33 (19)  | O33—W3—O17              | 89.44 (18)  |
| O32—W2—O13 | 161.28 (18) | O39—W3—W2               | 134.54 (14) |
| O32—W2—O17 | 89.13 (18)  | O39—W3—O5               | 94.60 (19)  |
| O32—W2—O30 | 93.33 (19)  | O5—W3—O17               | 73.80 (16)  |
| O5—W3—W2   | 82.54 (12)  | O13—W3—W2               | 34.82 (13)  |
| O5—W3—O16  | 83.70 (17)  | O13—W3—O5               | 90.66 (18)  |
| O39—W3—O13 | 100.32 (19) | W6—O1—W5                | 150.7 (3)   |
| O39—W3—O16 | 97.85 (19)  | Zn3—O2—W4               | 119.3 (2)   |
| O39—W3—O17 | 167.68 (19) | Zn3—O2—W6               | 119.3 (2)   |
| O39—W3—O33 | 102.7 (2)   | Zn3—O2—W11              | 117.2 (2)   |
| O8—W4—O2   | 75.11 (17)  | W4—O2—W11               | 96.32 (17)  |
| O8—W4—O14  | 159.78 (18) | W6—O2—W4                | 100.57 (17) |
| O8—W4—O24  | 89.66 (18)  | W6—O2—W11               | 99.89 (17)  |
| O9—W4—O2   | 90.73 (18)  | Zn3—O3—W7               | 118.7 (2)   |
| O9—W4—O8   | 91.68 (19)  | Zn3—O3—W8               | 120.9 (2)   |
| O9—W4—O14  | 85.60 (18)  | Zn3—O3—W12              | 119.7 (2)   |
| O9—W4—O24  | 162.16 (19) | W7—O3—W12               | 97.55 (17)  |
| O14—W4—O2  | 84.88 (17)  | W8—O3—W7                | 97.30 (18)  |
| O14—W4—O24 | 87.01 (17)  | W8—O3—W12               | 97.65 (18)  |
| O22—W4—O2  | 167.29 (19) | Zn3—O4—W5               | 120.2 (2)   |
| O22—W4—O8  | 100.1 (2)   | Zn3—O4—W9               | 119.9 (2)   |
| O22—W4—O9  | 101.3 (2)   | Zn3—O4—W10              | 118.5 (2)   |
| O22—W4—O14 | 100.1 (2)   | W5—O4—W10               | 97.36 (17)  |
| O22—W4—O24 | 96.0 (2)    | W9—O4—W5                | 97.49 (18)  |
| O24—W4—O2  | 72.44 (16)  | W9—O4—W10               | 98.53 (17)  |
| O1—W5—O4   | 88.49 (18)  | W1—O5—W3                | 113.4 (2)   |
| O1—W5—O26  | 160.51 (19) | W5—O6—W10               | 114.5 (2)   |
| O1—W5—O33  | 83.29 (18)  | W6—O7—Zn2 <sup>vi</sup> | 147.8 (3)   |
| O6—W5—O1   | 91.30 (19)  | W4—O8—W11               | 115.2 (2)   |
| O6—W5—O4   | 75.03 (17)  | W4—O9—W8                | 150.2 (3)   |
| O6—W5—O26  | 91.24 (19)  | W9—O10—W2               | 151.4 (3)   |
| O6—W5—O33  | 160.63 (19) | W8—O11—Zn2 <sup>v</sup> | 164.1 (3)   |
| O12—W5—O1  | 101.8 (2)   | W3—O13—W2               | 112.8 (2)   |
| O12—W5—O4  | 167.82 (19) | W1—O14—W4               | 154.7 (2)   |
| O12—W5—O6  | 98.1 (2)    | W6—O16—W3               | 148.8 (2)   |
| O12—W5—O26 | 96.9 (2)    | Zn3—O17—W1              | 119.6 (2)   |
| O12—W5—O33 | 101.3 (2)   | Zn3—O17—W2              | 119.8 (2)   |
| O26—W5—O4  | 73.54 (17)  | Zn3—O17—W3              | 120.9 (2)   |
| O26—W5—O33 | 87.97 (18)  | W2—O17—W1               | 96.81 (16)  |
| O33—W5—O4  | 86.21 (17)  | W2—O17—W3               | 97.12 (17)  |
| O1—W6—O2   | 89.56 (18)  | W3—O17—W1               | 97.16 (16)  |
| O1—W6—O21  | 87.08 (18)  | W7—O18—W9               | 152.2 (3)   |

|                     |             |             |             |
|---------------------|-------------|-------------|-------------|
| O1—W6—O24           | 164.31 (18) | W12—O19—W11 | 152.5 (3)   |
| O7—W6—O1            | 101.1 (2)   | W9—O20—Zn2  | 151.7 (3)   |
| O7—W6—O2            | 163.05 (19) | W11—O21—W6  | 113.1 (2)   |
| O7—W6—O16           | 102.7 (2)   | W8—O23—W7   | 113.9 (2)   |
| O7—W6—O21           | 93.30 (19)  | W6—O24—W4   | 112.0 (2)   |
| O7—W6—O24           | 93.85 (19)  | W8—O25—W1   | 153.4 (2)   |
| O16—W6—O1           | 89.04 (18)  | W9—O26—W5   | 113.9 (2)   |
| O16—W6—O2           | 90.48 (17)  | W10—O28—W9  | 113.6 (2)   |
| O16—W6—O21          | 163.95 (18) | W11—O29—W10 | 152.8 (2)   |
| O16—W6—O24          | 92.40 (18)  | W2—O30—W1   | 113.4 (2)   |
| O21—W6—O2           | 73.93 (17)  | W12—O31—W8  | 114.1 (2)   |
| O24—W6—O2           | 74.80 (17)  | W2—O32—W7   | 154.0 (3)   |
| O24—W6—O21          | 87.25 (18)  | W3—O33—W5   | 154.9 (3)   |
| O3—W7—W8            | 41.08 (12)  | W10—O34—W12 | 152.9 (3)   |
| O18—W7—W8           | 129.44 (14) | W7—O38—W12  | 115.1 (2)   |
| O18—W7—O3           | 89.07 (18)  | O11—W8—O3   | 168.14 (19) |
| O18—W7—O23          | 161.87 (19) | O11—W8—O9   | 98.8 (2)    |
| O18—W7—O32          | 84.34 (19)  | O11—W8—O23  | 98.9 (2)    |
| O23—W7—W8           | 32.82 (13)  | O11—W8—O25  | 102.2 (2)   |
| O23—W7—O3           | 73.74 (18)  | O11—W8—O31  | 96.3 (2)    |
| O32—W7—W8           | 84.51 (13)  | O23—W8—W7   | 33.33 (14)  |
| O32—W7—O3           | 86.32 (17)  | O23—W8—O3   | 74.79 (18)  |
| O32—W7—O23          | 88.76 (19)  | O23—W8—O9   | 161.9 (2)   |
| O37—W7—W8           | 131.92 (17) | O23—W8—O31  | 87.88 (19)  |
| O37—W7—O3           | 169.8 (2)   | O25—W8—W7   | 89.30 (14)  |
| O37—W7—O18          | 98.6 (2)    | O25—W8—O3   | 88.43 (18)  |
| O37—W7—O23          | 99.2 (2)    | O25—W8—O9   | 85.95 (18)  |
| O37—W7—O32          | 101.0 (2)   | O25—W8—O23  | 94.08 (19)  |
| O37—W7—O38          | 98.5 (2)    | O25—W8—O31  | 160.86 (19) |
| O38—W7—W8           | 84.21 (15)  | O31—W8—W7   | 81.90 (14)  |
| O38—W7—O3           | 74.61 (18)  | O31—W8—O3   | 73.70 (18)  |
| O38—W7—O18          | 90.5 (2)    | O10—W9—O4   | 88.32 (18)  |
| O38—W7—O23          | 90.4 (2)    | O10—W9—O18  | 86.18 (19)  |
| O38—W7—O32          | 160.33 (19) | O9—W8—O3    | 87.13 (18)  |
| O3—W8—W7            | 41.62 (12)  | O9—W8—O31   | 86.37 (18)  |
| O9—W8—W7            | 128.68 (14) | O11—W8—W7   | 132.05 (16) |
| <b>Compound 3</b>   |             |             |             |
| Ni1—N4              | 2.059 (12)  | W6—O2       | 2.341 (17)  |
| Ni1—N6 <sup>i</sup> | 2.075 (11)  | W6—O3       | 1.907 (16)  |
| Ni1—O1W             | 2.122 (10)  | W6—O16      | 2.017 (15)  |
| Ni1—O5W             | 2.087 (10)  | W6—O19      | 1.697 (12)  |
| Ni1—O6W             | 2.090 (10)  | W6—O21      | 2.303 (19)  |
| Ni1—O10             | 2.062 (9)   | W6—O22      | 2.148 (17)  |

|                          |            |                          |            |
|--------------------------|------------|--------------------------|------------|
| W1—O2                    | 2.263 (16) | W1—O9                    | 2.09 (3)   |
| W1—O4                    | 2.326 (16) | W1—O11 <sup>ii</sup>     | 1.832 (19) |
| W1—O5                    | 1.686 (14) | W1—O13                   | 1.873 (12) |
| W1—O18                   | 1.992 (13) | W2—O8                    | 1.94 (3)   |
| W2—O4                    | 2.316 (17) | W2—O9                    | 2.12 (3)   |
| W2—O6                    | 2.237 (17) | W2—O14                   | 1.937 (13) |
| W2—O7                    | 1.689 (14) | W2—O20                   | 2.022 (14) |
| W3—O2 <sup>ii</sup>      | 2.135 (17) | W3—O6                    | 2.118 (17) |
| W3—O3 <sup>ii</sup>      | 2.035 (13) | W3—O10                   | 1.737 (9)  |
| W3—O15                   | 1.829 (13) | W3—O11                   | 1.750 (19) |
| W3—O20                   | 2.068 (15) | W4—O1                    | 1.687 (9)  |
| W4—O8 <sup>ii</sup>      | 2.16 (3)   | W4—O4 <sup>ii</sup>      | 2.389 (16) |
| W4—O12                   | 2.022 (14) | W4—O16                   | 2.095 (14) |
| W4—O18 <sup>ii</sup>     | 1.932 (14) | O2—O11 <sup>ii</sup>     | 1.80 (2)   |
| W4—O21                   | 2.211 (16) | W5—O15                   | 1.961 (13) |
| W5—O12                   | 1.998 (14) | W5—O17                   | 1.615 (9)  |
| W5—O14                   | 2.134 (14) | W5—O21                   | 2.301 (17) |
| W5—O22                   | 1.916 (13) | O3—W6—O2                 | 68.4 (6)   |
| N4—Ni1—N6 <sup>i</sup>   | 95.2 (5)   | O3—W6—O16                | 103.2 (7)  |
| N4—Ni1—O1W               | 91.2 (4)   | O3—W6—O21                | 111.3 (7)  |
| N4—Ni1—O5W               | 91.0 (5)   | O3—W6—O22                | 175.8 (7)  |
| N4—Ni1—O6W               | 91.9 (5)   | O16—W6—O2                | 114.3 (7)  |
| N4—Ni1—O10               | 173.5 (5)  | O16—W6—O21               | 69.0 (6)   |
| N6 <sup>i</sup> —Ni1—O1W | 91.9 (4)   | O16—W6—O22               | 80.9 (6)   |
| N6 <sup>i</sup> —Ni1—O5W | 173.8 (5)  | O19—W6—O2                | 152.5 (7)  |
| N6 <sup>i</sup> —Ni1—O6W | 91.0 (5)   | O19—W6—O3                | 94.9 (7)   |
| O5W—Ni1—O1W              | 87.7 (5)   | O19—W6—O16               | 90.1 (6)   |
| O5W—Ni1—O6W              | 89.1 (5)   | O19—W6—O21               | 149.2 (7)  |
| O6W—Ni1—O1W              | 175.6 (4)  | O19—W6—O22               | 86.2 (6)   |
| O10—Ni1—N6 <sup>i</sup>  | 89.9 (4)   | O21—W6—O2                | 57.3 (6)   |
| O10—Ni1—O1W              | 84.5 (4)   | O22—W6—O2                | 109.0 (7)  |
| O10—Ni1—O5W              | 83.9 (4)   | O22—W6—O21               | 68.9 (6)   |
| O10—Ni1—O6W              | 92.1 (4)   | O5—W1—O11 <sup>ii</sup>  | 110.0 (8)  |
| O2—W1—O4                 | 50.3 (6)   | O9—W1—O2                 | 113.5 (10) |
| O5—W1—O2                 | 150.0 (6)  | O9—W1—O4                 | 74.0 (10)  |
| O5—W1—O4                 | 159.7 (6)  | O11 <sup>ii</sup> —W1—O2 | 50.7 (7)   |
| O13—W1—O2                | 72.4 (6)   | O11 <sup>ii</sup> —W1—O4 | 85.4 (7)   |
| O13—W1—O4                | 106.0 (6)  | O18—W1—O2                | 100.9 (6)  |
| O13—W1—O9                | 95.4 (9)   | O18—W1—O4                | 68.1 (6)   |
| O13—W1—O18               | 173.2 (6)  | O18—W1—O9                | 86.2 (10)  |
| O7—W2—O14                | 84.7 (6)   | O6—W2—O4                 | 52.0 (6)   |
| O7—W2—O20                | 88.5 (7)   | O7—W2—O4                 | 159.8 (7)  |

|                                       |            |                                        |            |
|---------------------------------------|------------|----------------------------------------|------------|
| O8—W2—O4                              | 75.8 (10)  | O7—W2—O6                               | 147.7 (7)  |
| O8—W2—O6                              | 111.7 (10) | O7—W2—O8                               | 92.9 (10)  |
| O8—W2—O20                             | 95.0 (11)  | O9—W2—O4                               | 73.7 (10)  |
| O20—W2—O4                             | 109.0 (6)  | O9—W2—O6                               | 113.0 (10) |
| O20—W2—O6                             | 69.6 (6)   | O14—W2—O4                              | 105.4 (6)  |
| O3 <sup>ii</sup> —W3—O2 <sup>ii</sup> | 70.7 (6)   | O14—W2—O6                              | 71.7 (6)   |
| O3 <sup>ii</sup> —W3—O6               | 105.5 (6)  | O14—W2—O8                              | 175.8 (11) |
| O3 <sup>ii</sup> —W3—O20              | 86.5 (5)   | O14—W2—O20                             | 88.4 (6)   |
| O6—W3—O2 <sup>ii</sup>                | 54.1 (6)   | O15—W3—O2 <sup>ii</sup>                | 96.0 (6)   |
| O10—W3—O2 <sup>ii</sup>               | 149.8 (5)  | O15—W3—O3 <sup>ii</sup>                | 166.6 (6)  |
| O10—W3—O3 <sup>ii</sup>               | 88.1 (5)   | O15—W3—O3 <sup>iii</sup>               | 147.3 (10) |
| O10—W3—O6                             | 155.9 (6)  | O15—W3—O6                              | 64.1 (6)   |
| O10—W3—O11                            | 106.0 (7)  | O15—W3—O20                             | 97.3 (6)   |
| O10—W3—O15                            | 104.6 (5)  | O20—W3—O2 <sup>ii</sup>                | 108.9 (6)  |
| O10—W3—O20                            | 90.3 (5)   | O20—W3—O6                              | 71.2 (6)   |
| O11—W3—O2 <sup>ii</sup>               | 54.0 (7)   | O8 <sup>ii</sup> —W4—O4 <sup>ii</sup>  | 70.4 (9)   |
| O11—W3—O3 <sup>ii</sup>               | 88.6 (7)   | O8 <sup>ii</sup> —W4—O21               | 107.5 (9)  |
| O11—W3—O6                             | 94.3 (7)   | O12—W4—O4 <sup>ii</sup>                | 111.2 (6)  |
| O11—W3—O15                            | 84.0 (7)   | O12—W4—O8 <sup>ii</sup>                | 176.5 (10) |
| O11—W3—O20                            | 162.8 (7)  | O12—W4—O16                             | 82.3 (6)   |
| O1—W4—O4 <sup>ii</sup>                | 156.1 (5)  | O12—W4—O21                             | 71.9 (6)   |
| O1—W4—O8 <sup>ii</sup>                | 90.7 (9)   | O16—W4—O4 <sup>ii</sup>                | 108.0 (6)  |
| O1—W4—O12                             | 88.6 (5)   | O16—W4—O8 <sup>ii</sup>                | 94.3 (10)  |
| O1—W4—O16                             | 87.4 (5)   | O16—W4—O21                             | 69.5 (6)   |
| O1—W4—O18 <sup>ii</sup>               | 96.6 (5)   | W1—O2—W6                               | 98.3 (6)   |
| O1—W4—O21                             | 151.1 (6)  | W3 <sup>ii</sup> —O2—W1                | 103.5 (7)  |
| O18 <sup>ii</sup> —W4—O21             | 107.3 (6)  | W3 <sup>ii</sup> —O2—W6                | 99.6 (7)   |
| O21—W4—O4 <sup>ii</sup>               | 52.4 (6)   | O11 <sup>ii</sup> —O2—W1               | 52.1 (7)   |
| O12—W5—O14                            | 168.5 (6)  | O11 <sup>ii</sup> —O2—W3 <sup>ii</sup> | 52.0 (7)   |
| O12—W5—O21                            | 70.4 (6)   | O11 <sup>ii</sup> —O2—W6               | 111.1 (9)  |
| O14—W5—O21                            | 105.9 (6)  | W6—O3—W3 <sup>ii</sup>                 | 120.4 (7)  |
| O15—W5—O12                            | 85.2 (6)   | W1—O4—W4 <sup>ii</sup>                 | 96.6 (6)   |
| O15—W5—O14                            | 83.8 (6)   | W2—O4—W1                               | 98.7 (6)   |
| O15—W5—O21                            | 88.9 (6)   | W2—O4—W4 <sup>ii</sup>                 | 96.1 (6)   |
| O17—W5—O12                            | 94.6 (6)   | W3—O6—W2                               | 104.5 (7)  |
| O17—W5—O14                            | 91.1 (5)   | W2—O8—W4 <sup>ii</sup>                 | 117.0 (15) |
| O17—W5—O15                            | 102.1 (5)  | W1—O9—W2                               | 113.5 (15) |
| O17—W5—O21                            | 160.8 (5)  | W3—O10—Ni1                             | 151.3 (6)  |
| O17—W5—O22                            | 95.7 (5)   | W3—O11—W1 <sup>ii</sup>                | 149.4 (11) |
| O22—W5—O12                            | 89.0 (6)   | W3—O11—O2 <sup>ii</sup>                | 74.0 (9)   |
| O22—W5—O14                            | 100.4 (6)  | O2 <sup>ii</sup> —O11—W1 <sup>ii</sup> | 77.1 (9)   |

|                          |           |           |           |
|--------------------------|-----------|-----------|-----------|
| O22—W5—O15               | 161.7 (6) | W5—O12—W4 | 117.9 (7) |
| O22—W5—O21               | 72.8 (6)  | W2—O20—W3 | 114.7 (7) |
| W2—O14—W5                | 125.2 (7) | W4—O21—W5 | 99.5 (7)  |
| W3—O15—W5                | 140.9 (7) | W4—O21—W6 | 102.3 (6) |
| W6—O16—W4                | 117.5 (7) | W5—O21—W6 | 99.0 (7)  |
| W4 <sup>ii</sup> —O18—W1 | 127.5 (7) | W5—O22—W6 | 118.9 (7) |

Symmetry codes: **(1)**: (i)  $y-1/2, -z+3/2, -x+1$ ; (ii)  $-z+1, x+1/2, -y+3/2$ ; (iii)  $z, -x+3/2, y-1/2$ ; (iv)  $z, x, y$ ; (v)  $-z+1, -x+1, -y+1$ ; (vi)  $-x+1, -y+1, -z+1$ ; (vii)  $y, z, x$ ; (viii)  $-y+1, -z+1, -x+1$ ; (ix)  $-x+1, -y+2, -z+1$ ; (x)  $-y+3/2, z+1/2, x$ ; (xi)  $-z+1/2, -x+1, y-1/2$ ; (xii)  $-y+1, z+1/2, -x+1/2$ .

**(2)**: (i)  $x+1/2, y-1/2, z$ ; (ii)  $-x+1/2, y-1/2, -z+1/2$ ; (iii)  $-x+1, y, -z+1/2$ ; (iv)  $x, y-1, z$ ; (v)  $x-1/2, y+1/2, z$ ; (vi)  $x, y+1, z$ . **(3)** (i)  $-x, -y, -z-1$ ; (ii)  $-x, -y-2, -z-2$ .
